# Supplementary material for: Frequency of stressful life events and associations with mental health and general subjective health in the general population
Source: Springer Nature journal article supplement (doi:10.1007/s10389-020-01204-3), 2020-02-12
Supplement: MOESM1 [file 17688318]

Table 1

Descriptive characteristics of life events in the past year in a German representative sample (N = 12,947)

|  | **Frequency (%)** | | | | | | | | | |
| --- | --- | --- | --- | --- | --- | --- | --- | --- | --- | --- |
| **Life Events** | **All** | **Sex** | | **Age** | | | | **Socioeconomic status** | | |
|  | ***f*** | ***m*** | ***35-44*** | ***45-54*** | ***55-64*** | ***65-74*** | ***low*** | ***middle*** | ***high*** |
| 1. Marriage | 103 (0.8) | 42 (0.7) | 61 (0.9) | 54 (1.8) | 32 (1.0) | 14 (0.4) | 3 (0.1) | 6 (0.4) | 38 (0.6) | 59 (1.0) |
| 1. Fired at work | 306 (2.4) | 143 (2.3) | 163 (2.5) | 115 (3.8) | 112 (3.4) | 74 (2.2) | 5 (0.2) | 48 (3.6) | 157 (2.7) | 99 (1.8) |
| 1. Retirement | 427 (3.3) | 212 (3.3) | 215 (3.3) | 5 (0.2) | 10 (0.3) | 280 (8.3) | 132 (4.2) | 61 (4.6) | 207 (3.6) | 157 (2.8) |
| 1. Business readjustment | 718 (5.7) | 310 (5.0) | 408 (6.4) | 342 (11.5) | 231 (7.0) | 123 (3.7) | 22 (0.7) | 19 (1.4) | 262 (4.6) | 436 (7.8) |
| 1. Change in responsibilities at work | 1,429 (11.3) | 659 (10.6) | 770 (12.1) | 693 (23.3) | 529 (16.0) | 184 (5.6) | 23 (0.8) | 60 (4.6) | 514 (9.0) | 853 (15.3) |
| 1. Son or daughter leaving home | 550 (4.3) | 292 (4.6) | 258 (4.0) | 56 (1.9) | 293 (8.9) | 173 (5.2) | 28 (0.9) | 45 (3.4) | 228 (50.9) | 272 (4.9) |
| 1. Trouble with in-laws | 451 (3.5) | 271 (4.3) | 180 (2.8) | 226 (7.5) | 293 (8.9) | 72 (2.1) | 13 (0.4) | 16 (1.2) | 188 (3.2) | 245 (4.4) |
| 1. Change in residence | 515 (4.0) | 229 (3.6) | 286 (4.4) | 242 (8.1) | 155 (4.6) | 79 (2.3) | 39 (1.2) | 53 (3.9) | 212 (3.6) | 249 (4.4) |
| 1. Change in recreation | 1,424 (11.2) | 796 (12.7) | 628 (9.8) | 564 (19.1) | 420 (12.7) | 330 (9.9) | 110 (3.6) | 98 (7.5) | 598 (10.4) | 723 (13.0) |
| 1. Vacation | 8,721 (68.6) | 4,411 (70.1) | 4,310 (67.1) | 2,353 (78.6) | 2,430 (73.3) | 2,156 (64.9) | 1,782 (57.8) | 622 (47.0) | 3,582 (62.4) | 4,485 (80.3) |
| 1. Minor violations of law | 1,136 (9.0) | 336 (5.3) | 800 (12.5) | 424 (14.3) | 319 (9.7) | 250 (7.5) | 143 (4.6) | 38 (2.9) | 391 (6.8) | 705 (12.7) |
| 1. Change in sleeping habits | 1,580 (12.4) | 870 (13.8) | 710 (11.0) | 582 (19.5) | 470 (14.2) | 364 (10.8) | 164 (5.2) | 152 (11.5) | 732 (12.6) | 692 (12.3) |
| 1. Change in financial state | 1,635 (12.8) | 764 (12.1) | 871 (13.5) | 689 (23.1) | 481 (14.5) | 353 (10.5) | 112 (3.6) | 135 (10.2) | 705 (12.2) | 791 (14.1) |
| 1. Christmas alone | 308 (2.4) | 134 (2.1) | 174 (2.7) | 76 (2.5) | 88 (2.6) | 76 (2.3) | 68 (2.2) | 48 (3.6) | 152 (2.6) | 107 (1.9) |
| 1. Divorce | 138 (1.1) | 63 (1.0) | 75 (1.2) | 53 (1.8) | 57 (1.7) | 23 (0.7) | 5 (0.2) | 9 (0.7) | 64 (1.1) | 63 (1.1) |
| 1. Death of Spouse | 80 (0.6) | 58 (0.9) | 22 (0.3) | 5 (0.2) | 12 (0.4) | 30 (0.9) | 33 (1.0) | 24 (1.8) | 40 (0.7) | 16 (0.3) |
| 1. Personal injury or illness | 2,927 (23.7) | 1,424 (23.4) | 1,503 (24.0) | 942 (32.3) | 818 (25.5) | 677 (20.9) | 490 (16.5) | 224 (17.7) | 1,229 (22.1) | 1,461 (26.8) |
| 1. Marital reconciliation | 1,353 (11.2) | 688 (11.6) | 665 (10.8) | 487 (16.9) | 476 (15.1) | 280 (8.9) | 110 (3.8) | 60 (4.8) | 542 (9.9) | 745 (14.0) |
| 1. Pregnancy | 132 (1.1) | 71 (1.1) | 61 (1.0) | 112 (3.8) | 18 (0.6) | 2 (0.1) | 0 (0.0) | 0 (0.0) | 34 (0.6) | 97 (1.8) |
| 1. Change to a different line of work | 1,120 (8.8) | 535 (8.5) | 585 (9.1) | 544 (18.3) | 372 (11.3) | 181 (5.4) | 23 (0.7) | 71 (5.4) | 434 (7.5) | 614 (11.0) |
| 1. Trouble with boss | 1,718 (13.5) | 781 (12.4) | 937 (14.6) | 706 (23.7) | 685 (20.7) | 318 (9.6) | 9 (0.3) | 82 (6.2) | 680 (11.9) | 953 (17.1) |
| 1. Change in church activities | 274 (2.1) | 149 (2.4) | 125 (1.9) | 120 (4.0) | 79 (2.4) | 48 (1.4) | 27 (0.9) | 9 (0.7) | 117 (2.0) | 148 (2.6) |
| 1. Begin or end school | 75 (0.6) | 44 (0.7) | 31 (0.5) | 53 (1.8) | 16 (0.5) | 3 (0.1) | 3 (0.1) | 6 (0.5) | 30 (0.5) | 39 (0.7) |
| 1. Change in living conditions | 703 (5.5) | 322 (5.1) | 381 (5.9) | 330 (11.1) | 197 (5.9) | 121 (3.6) | 55 (1.8) | 58 (4.5) | 291 (5.1) | 353 (6.3) |
| 1. Marital separation | 165 (1.3) | 82 (1.3) | 83 (1.3) | 67 (2.2) | 61 (1.8) | 28 (0.8) | 9 (0.3) | 10 (0.8) | 73 (1.3) | 81 (1.4) |
| 1. Death of close family member | 1,229 (9.6) | 611 (9.7) | 618 (9.6) | 303 (10.2) | 384 (11.6) | 328 (9.8) | 214 (6.9) | 124 (9.4) | 529 (9.2) | 570 (10.2) |
| 1. Change in schools | 25 (0.2) | 14 (0.2) | 11 (0.2) | 16 (0.5) | 5 (0.2) | 2 (0.1) | 2 (0.1) | 2 (0.2) | 4 (0.1) | 19 (0.3) |
| 1. Outstanding personal achievement | 2,302 (19.2) | 1,096 (18.7) | 1,206 (19.6) | 835 (29.3) | 767 (24.3) | 478 (15.3) | 222 (7.7) | 131 (10.7) | 855 (15.8) | 1,312 (24.7) |
| 1. Change of personal habits | 2,014 (16.2) | 1,079 (17.6) | 935 (14.8) | 781 (26.7) | 670 (20.5) | 411 (12.6) | 152 (5.1) | 118 (9.3) | 787 (14.0) | 1,192 (20.0) |
| 1. Spouse begins or stops work | 555 (4.4) | 250 (4.0) | 305 (4.8) | 164 (5.5) | 143 (4.3) | 189 (5.7) | 59 (1.9) | 47 (3.7) | 252 (4.4) | 253 (4.5) |
| 1. Foreclosure on mortgage or loan | 343 (2.7) | 171 (2.8) | 172 (2.7) | 83 (2.8) | 133 (4.1) | 97 (3.0) | 30 (1.0) | 23 (1.8) | 134 (2.4) | 186 (3.4) |
| 1. Jail term | 9 (0.1) | 4 (0.1) | 5 (0.1) | 5 (0.2) | 2 (0.1) | 1 (0.0) | 1 (0.0) | 0 (0.0) | 7 (0.1) | 2 (0.1) |
| 1. Change in health of family member | 2,226 (17.7) | 1,213 (19.5) | 1,013 (15.9) | 714 (24.2) | 719 (22.0) | 500 (15.2) | 293 (9.6) | 140 (10.9) | 946 (16.6) | 1,128 (20.3) |
| 1. Sexual difficulties | 835 (6.6) | 350 (5.6) | 485 (7.5) | 196 (6.6) | 255 (7.7) | 230 (6.9) | 154 (5.0) | 66 (5.1) | 354 (6.2) | 414 (7.4) |
| 1. Gain of new family member | 741 (5.9) | 380 (6.1) | 361 (5.6) | 231 (7.8) | 201 (6.1) | 210 (6.3) | 99 (3.2) | 57 (4.4) | 342 (6.0) | 341 (6.1) |
| 1. Death of close friend | 1,128 (8.8) | 594 (9.4) | 534 (8.3) | 189 (6.3) | 291 (8.8) | 331 (9.9) | 317 (10.2) | 118 (8.9) | 519 (9.0) | 482 (8.6) |

Note: Reported statistics are number of cases, percentage are in brackets. Socioeconomic status was categorized based on Lampert & Kroll (2009).
